# Supplementary material for: Modified Potato Starch as a Potential Retardant for Prolonged Release of Lidocaine Hydrochloride from Methylcellulose Hydrophilic Gel
Source: MDPI journal article supplement (doi:10.3390/pharmaceutics15020387), 2023-01-23
Supplement: s1 [file s1]

# Modified Potato Starch as a Potential Retardant for Prolonged Release of Lidocaine Hydrochloride from Methylcellulose Hydrophilic Gel

Justyna Kobryń <sup>1</sup>, Bartosz Raszewski <sup>2</sup>, Tomasz Zięba <sup>2</sup> and Witold Musiał <sup>1,\*</sup>

<sup>1</sup> Department and Chair of Physical Chemistry and Biophysics, Wrocław Medical University, Borowska 211A, 50-556 Wrocław, Poland

<sup>2</sup> Department of Food Storage and Technology, Faculty of Biotechnology and Food Science, Wrocław University of Environmental and Life Sciences, Chelmońskiego 37, 51-630 Wrocław, Poland

\* Correspondence: witold.musial@umw.edu.pl

## Supplementary materials:

**Table S1.** Comparison of the *p*-values of the tested samples and the reference sample based on the Student's *t*-test with Benferroni correction ( $\alpha = 0.01$ ). The red values indicate non-statistical significance of the formulation data—released drug percent after 2 h (A) and 24 h (B).

| A: <i>p</i> value | F0     | F1     | F2     | F3     | F4     |
|-------------------|--------|--------|--------|--------|--------|
| REF               | 0.8808 | 0.5814 | 0.0570 | 0.3584 | 0.0130 |
| B: <i>p</i> value | F0     | F1     | F2     | F3     | F4     |
| REF               | 0.0861 | 0.1165 | 0.9153 | 0.8188 | 0.0747 |

**Table S2.** Comparison of the *p*-values of the tested samples and the reference sample based on the ANOVA test ( $\alpha = 0.05$ ). The red values indicate non-statistical significance of the formulation data—viscosity.

| <i>p</i> value | F1        | F2        | F3        | F4        | REF       |
|----------------|-----------|-----------|-----------|-----------|-----------|
| F1             | -         | 0.156778  | <0.000001 | 0.02012   | <0.000001 |
| F2             | 0.156778  | -         | <0.000001 | 0.220189  | <0.000001 |
| F3             | <0.000001 | <0.000001 | -         | <0.000001 | <0.000001 |
| F4             | 0.02012   | 0.220189  | <0.000001 | -         | <0.000001 |
| REF            | <0.000001 | <0.000001 | <0.000001 | <0.000001 | -         |
